# Supplementary material for: Patterns of statin utilisation for new users and market dynamics in South Korea: a 13-year retrospective cohort study
Source: PubMed Central journal article supplement — BMJ Open. 2019 Mar 5;9(3):e026603. doi: 10.1136/bmjopen-2018-026603 (PMC6430099; doi:10.1136/bmjopen-2018-026603), 2019-03-05
Supplement: bmjopen-2018-026603supp001.pdf [file bmjopen-2018-026603supp001.pdf]

## Appendix 1. Drug code of statins in Korea

| Drug Names                  | ATC code | National Code System<br>(Strength and code) |                         | The date of drug entry |                      |
|-----------------------------|----------|---------------------------------------------|-------------------------|------------------------|----------------------|
|                             |          |                                             |                         | New drug               | First follow on drug |
| Atorvastatin                | C10AA05  | 10                                          | 111501ATB               | 1999.08.01             | 2007.01.17           |
|                             |          | 20                                          | 111502ATB               |                        |                      |
|                             |          | 40                                          | 111503ATB               |                        |                      |
|                             |          | 80                                          | 111504ATB               |                        |                      |
| Fluvastatin                 | C10AA04  | 20                                          | 162401ACH               | 1994.10.10             | N/A                  |
|                             |          | 40                                          | 162402ACH               |                        |                      |
|                             |          | 80                                          | 162403ATR               |                        |                      |
| Lovastatin                  | C10AA02  | 20                                          | 185801ATB               | 1997.08.06             | 1997.12.11           |
| Pitavastatin                | C10AA08  | 1                                           | 470902ATB               | 2005.01.06             | 2011.05.24           |
|                             |          | 2                                           | 470901ATB               |                        |                      |
|                             |          | 4                                           | 470903ATB               |                        |                      |
| Pravastatin                 | C10AA03  | 5                                           | 216602ATB               | 1990.04.10             | 1994.05.17           |
|                             |          | 10                                          | 216601ATB               |                        |                      |
|                             |          | 20                                          | 216603ATB               |                        |                      |
|                             |          | 40                                          | 216604ATB               |                        |                      |
| Rosuvastatin                | C10AA07  | 5                                           | 454003ATB               | 2002.01.15             | 2008.11.07           |
|                             |          | 10                                          | 454001ATB               |                        |                      |
|                             |          | 20                                          | 454002ATB               |                        |                      |
| Simvastatin                 | C10AA01  | 5                                           | 227805ATB               | 1996.08.01             | 2002.07.09           |
|                             |          | 10                                          | 227803ATB               |                        |                      |
|                             |          | 20                                          | 227801ATB,<br>227801ATR |                        |                      |
|                             |          | 40                                          | 227802ATB               |                        |                      |
|                             |          | 80                                          | 227806ATB               |                        |                      |
| Ezetimibe and atorvastatin  | C10BA05  | 10 + 10                                     | 633800ATB               |                        |                      |
|                             |          | 10 + 20                                     | 633900ATB               |                        |                      |
|                             |          | 10 + 40                                     | 634800ATB               |                        |                      |
| Ezetimibe and rosuvastatin  | C10BA06  | 10 + 5                                      | 640700ATB               |                        |                      |
|                             |          | 10 + 10                                     | 640800ATB               |                        |                      |
|                             |          | 10 + 20                                     | 640900ATB               |                        |                      |
| Ezetimibe and simvastatin   | C10BA02  | 10 + 10                                     | 471000ATB               |                        |                      |
|                             |          | 10 + 20                                     | 471100ATB               |                        |                      |
| Fenofibrate and simvastatin | C10BA04  | 145 + 20                                    | 631400ATB               |                        |                      |
|                             |          | 145 + 40                                    | 631500ATB               |                        |                      |

ATC: anatomical therapeutic chemical
